# Supplementary material for: Non-amine-based furan-containing oligoaryls as efficient hole transporting materialsElectronic supplementary information (ESI) available: experimental details. See http://www.rsc.org/suppdata/cc/b2/b207489c/
Source: Royal Society of Chemistry journal article supplement (doi:10.1039/b207489c), 2002-09-16
Supplement: b207489c.doc [file b207489c.doc]

Non-amine-based Furan-containing Oligoaryls

as Efficient Hole Transporting Materials

Ling-Zhi Zhang,a Chieh-Wei Chen,b Chin-Fa Lee,a Chung-Chih Wu,b,* and Tien-Yau Luha,c,*

aDepartment of Chemistry, National Taiwan University, Taipei, Taiwan 106

bInstitute of Optoelectronics, National Taiwan University, Taipei, Taiwan 106

cInstitute of Chemistry, Academia Sinica, Taipei, Taiwan 115

# Supporting Information

# Experimental Section

1H and 13C NMR spectra were recorded on a Varian 400-MHz spectrometer. UV-vis absorption spectra were measured on a Shimadzu UV-1601PC UV-Visible spectrophotometer. Emission spectra were taken on an Aminco-Bowman Series 2 Luminescence spectrometer, and the quantum efficiencies were obtained by standard method using Coumarin 1 (f = 0.99 in ethyl acetate) as reference. FTIR spectra were measured on a Nicolet Magna-IR (series II) spectrophotometer. Cyclic voltammetry experiments were performed with an BAS CV-27 electrochemical analyzer. All measurements were carried out at room temperature with a conventional three-electrode configuration consisting of a platinum working electrode, an auxiliary platinum electrode, and a nonaqueous Ag/AgNO3 (0.01 M in CH3CN) reference electrode. CH2Cl2 was used as the solvent, and the supporting electrolyte was 0.1 M Bu4N+PF6 in all experiments. E1/2 values were determined as (Epa + Epc)/2, where Epa and Epc are the anodic and cathodic peak potentials, respectively. All potentials are reported with reference to Fc+/Fc external standard. The differential scanning calorimetry (DSC) measurements were obtained on a TA Instrument 2920 thermal analyzer at a heating rate of 10 C/min. TGA measurements were performed on a TA Instrument 2950 TGA thermal analyzer. Elemental analyses were performed on a Perkin-Elmer CHN-2400 II analyzer.

Tetrahydrofuran (THF) was distilled from benzophenone ketyl. Dichloromethane for reaction and electrochemical measurements was distilled from calcium hydride under nitrogen atmosphere. -NPD, Alq and DMQA were received from commercial source and sublimed before use.

**Synthesis of Furan-Containing Oligoaryls 2.**

**2a**. Under nitrogen atmosphere, to a solution of 2-phenyl-2-(2-phenylethynyl)-dithiolane (11.3 g, 40.0 mmol) in THF (200 mL) cooled to –78 C was added dropwise BuLi (16 mL, 2.5 M in hexane, 150 mmol). The mixture was stirred at –78 C for 1 h to which a solution of terephthalaldehyde (2.68 g, 20.0 mmol) in THF (100 mL) was introduced and the mixture was gradually warmed to rt. After stirred for an additional 1.5 h, trifluoroacetic acid (3 mL, 39.0 mmol) was added and the mixture was stirred at rt for 10 h, quenched with saturated NH4Cl, and washed with NaHCO3 (10%), water, brine and dried (MgSO4). Evaporation of the solvent in vacuo to give the residue which was recrystallized from chloroform to give **2a** (6.0 g, 58%): mp 291-292 C; 1H NMR (400 MHz, CDCl3)  6.81 (s, 2 H), 7.55 (s, 4 H), 7.29 (tt, *J* = 7.2, 1.2 Hz, 2 H), 7.35(tt, *J* = 7.2, 1.2 Hz, 2 H), 7.40 (br.t, *J* = 7.2, 4H), 7.41 (br.t, *J* = 7.2 Hz, 4 H), 7.48 (dt, *J* = 7.2, 1.2 Hz, 4 H), 7.55(s, 4 H); 7.75 (dt, *J* = 7.2, 1.2 Hz, 4 H); 13C NMR (100 MHz, CDCl3)  109.7, 123.8, 125.0, 125.8, 127.4, 127.6, 128.71, 128.74, 129.9, 130.4, 134.3, 147.5, 152.6; IR (KBr) 1596, 1513, 1490, 1451, 1151, 954, 759, 692; Anal. Calcd for C38H26O2: C, 88.69; H, 5.09. Found: C, 88.63; H, 5.41.

**2b.** In a manner similar to that described above, 1,4-bisformylbiphenyl (1.05 g, 5.0 mmol) was allowed to react with the allenyl anion generated from the reaction of 2-phenyl-2-(1-phenylethynyl)- dithiolane (2.82 g, 10 mmol) in THF (100 mL) with BuLi (4 mL, 2.5 M in hexane, 10 mmol), then with CF3CO2H (1.5 mL, 19.5 mmol), and followed by usual workup to give **2b** (2.5 g, 60%) mp 232-234 C; 1H NMR (400 MHz, CDCl3)  6.82 (s, 2 H), 7.28 (tt, *J* = 7.2, 1.2 Hz, 2 H), 7.33 (tt, *J* = 7.2, 2.4 Hz, 2 H), 7.40 (br.t, *J* = 7.2, 4 H), 7.41 (br.t, *J* = 7.2, 4 H), 7.49 (dt, *J* = 7.2, 1.2 Hz, 4 H), 7.54 (dt, *J* = 8.8, 1.6 Hz, 4 H), 7.66 (dt, *J* = 8.8, 1.6 Hz, 4 H), 7.76 (dt, *J* = 7.2, 1.6 Hz, 4 H),; 13C NMR (400 MHz, CDCl3)  109.7, 123.9, 124.9, 126.4, 126.8, 127.4, 127.6, 128.7, 128.8, 130.1, 130.5, 134.3, 139.3, 147.6, 152.7; IR (KBr) 1596, 1505, 1490, 1451, 1151, 823, 758, 701; Anal. Calcd for C38H26O2: C, 89.46; H, 5.12. Found: C, 89.41; H, 4.95.

**2c.** In a manner similar to that described above, the reaction of 2-(hex-1-yn-1-yl)-2-phenyldi- thiolane (520 mg, 2.0 mmol) in THF (10 mL) with *n*-BuLi (0.8 mL, 2.5 M in hexane, 2 mmol) to generate the corresponding allenyl anion which was then treated with 1,4-bisformylbiphenyl(210 mg, 1.0 mmol), then with CF3CO2H (0.4 mL, 5.2 mmol) and usual workup to afford **2c** (187 mg, 34%): mp 152-153 C; 1H NMR (400 MHz, CDCl3)  0.99 (t, *J* = 7.3 Hz, 6 H), 1.48 (sext, *J* = 7.3, 4 H), 1.72 (tt, *J* = 7.6, 7.3 Hz, 4 H), 2.75 (t, *J* = 7.6, 4 H), 6.69 (s, 2 H), 7.27 (t, *J* = 7.9, 2 H), 7.41(t, *J* = 7.9, 4 H), 7.73 (d, *J* = 8.6, 2 H), 7.75 (t, *J* = 7.9, 4 H), 7.80 (d, *J* = 8.6, 4 H); 13C NMR (100 MHz, CDCl3)  14.0, 22.7, 25.9, 32.1, 109.4, 123.7, 124.5, 125.8, 126.9, 127.2, 128.7, 130.76, 130.78, 138.7, 147.6, 152; IR (neat,): 3034, 2960, 2931, 2873, 2858, 1613, 1594, 1577, 1534, 1493, 1474, 1374, 1276, 1191, 1115, 1073, 1003, 931, 910, 824, 798, 761, 722, 691, 667, 490 cm-1; Anal. Calcd for C40H38O2: C, 87.24; H, 6.95. Found: C, 87.16; H, 7.27.

**General Procedure for Fabrication of Devices 1-9.**

The device on the glass substrate has the typical structure of multiple organic layers sandwiched between the bottom indium-tin-oxide (ITO) anode and the top Mg:Ag(80 nm)/Ag(150 nm) or LiF(0.5 nm)/Al(150 nm) bilayer cathode. The stack of organic layers consists of a thin layer of conducting polymer poly(ethylenedioxythiophene/polystyrene sulfonate, PEDT:PSS, Bayer Corp.) as the hole-injection layer, **1** or **2** as hole transporting layer, Alq3 as the electron transporting layer and the emitting layer. The PEDT:PSS layer was prepared by spin coating. All organic materials were deposited at a rate of 0.2-0.3 nm/s by thermal evaporation at 10-6 Torr. Unless otherwise specified, the thicknesses of PEDT:PSS, hole-transporting layer and Alq were 30, 40 and 60 nm, respectively. DMQA was used as a dopant in Alq, and the device configuration for the doping case has been described in Results and Discussion. The current-voltage-brightness (I-V-L) characterization of the devices was carried out by a Agilent 4155B semiconductor parameter analyzer and calibrated silicon photodetectors.
